1 **A comparison of critical speed and critical power in runners using Stryd running power**

2

3 van Rassel, C. R.<sup>1</sup>, Sales, M. K.<sup>1</sup>, Ajayi, O. O.<sup>1</sup>, Nagai, K.<sup>1</sup>, & MacInnis, M. J.<sup>1\*</sup>

4 <sup>1</sup>Faculty of Kinesiology, University of Calgary, Calgary, AB, Canada T2N 1N4

5

6 \*Corresponding Author: Martin MacInnis, PhD

7 **Abstract**

8 **Purpose:** Although running traditionally relies on critical speed (CS) as an indicator of critical  
9 intensity, portable inertial measurement units (IMUs) offer a potential solution for estimating  
10 running mechanical power to assess critical power (CP) in runners. The purpose of this study  
11 was to determine whether CS and CP differ when assessed using the Stryd device, a portable  
12 IMU, and if two running bouts are sufficient to determine CS and CP.

13 **Methods:** On an outdoor running track, ten trained runners ( $\dot{V}O_{2max}$ , 59.0 [4.2] ml·kg<sup>-1</sup>·min<sup>-1</sup>)  
14 performed three running time-trials (TT) between 1200 and 4400m on separate days. CS and CP  
15 were derived from two-parameter hyperbolic speed-time and power-time models, respectively,  
16 using two (CS<sub>2TT</sub> CP<sub>2TT</sub>) and three (CS<sub>3TT</sub> CP<sub>3TT</sub>) time trials. Subsequently, runners performed  
17 constant intensity running for 800m at their calculated CS<sub>3TT</sub> and CP<sub>3TT</sub>.

18 **Results:** Running at the calculated CS<sub>3TT</sub> speed (3.88 [0.44] m·s<sup>-1</sup>) elicited an average Stryd  
19 running power (271 [28] W) not different from the calculated CP<sub>3TT</sub> (270 [28]; p=0.940; d=0.02),  
20 with excellent agreement between the two values (ICC=0.980). The CS<sub>2TT</sub> (3.97 [0.42] m·s<sup>-1</sup>)  
21 was not significantly higher than CS<sub>3TT</sub> (3.89 [0.44] m·s<sup>-1</sup>; p=0.178; d=0.46); however, CP<sub>2TT</sub>  
22 (278 [29] W) was significantly greater than CP<sub>3TT</sub> (p=0.041; d=0.75).

23 **Conclusion:** The running intensities at CS and CP were similar, supporting the use of running  
24 power (Stryd) as a metric of aerobic fitness and exercise prescription, and two trials provided a  
25 reasonable, albeit higher, estimate of CS and CP.

26

27 **Keywords:** Inertial measurement unit, running power, critical intensity, exercise training,  
28 exercise performance

29

## 30 Introduction

31 Critical power (CP), the asymptote of the power-duration relationship, is a fundamental  
32 concept in sport science and exercise physiology. As CP demarcates the boundary between  
33 heavy and severe intensities of exercise, exercise below CP is characterized by a metabolic  
34 steady state, whereas exercising above CP elicits continually increasing oxygen consumption  
35 rates ( $\dot{V}O_2$ ) and blood lactate concentrations as well as accelerated performance fatiguability.<sup>1</sup>  
36 Accordingly, CP is important for quantifying aerobic fitness and developing individualized  
37 exercise training programs.

38 For cycling, power output (PO) is derived from the product of angular velocity and  
39 torque measured at the pedal, crank, bottom bracket, or rear wheel, facilitating measures of CP;  
40 however, technical issues have limited the adoption of CP to running. While the lack of a  
41 dissipative external load makes it difficult to quantify running PO, a well-agreed upon approach  
42 to evaluate mechanical running PO also does not exist.<sup>2</sup> Thus, speed has historically been used to  
43 derive an intensity-duration relationship for running, with the asymptote of the speed-time  
44 relationship termed critical speed (CS). Similar to cycling CP, the CS is derived from multiple  
45 maximal bouts, with a fixed running distance or speed, selected to elicit task completion or  
46 failure between 2 and 15 minutes.<sup>3,4</sup> Consumer technologies that provide users with a running  
47 power metric, including Stryd,<sup>5</sup> could facilitate the derivation of a power-duration relationship  
48 and identification of CP for running.

49 The Stryd running power device utilizes a portable inertial measurement unit (IMU) and  
50 generates a running power metric. While there is a strong linear relationship between Stryd  
51 running power and running speed,<sup>6,7</sup> whether CS and CP represent equivalent intensities has not  
52 been explored. Using the Stryd running power device, the purpose of this investigation was to  
53 determine whether the running intensities associated with CS and CP differ and whether CS and  
54 CP differ when measured with two, as opposed to three, time trials (TT).

## 55 Methods

56 Ten (7 male; 3 female) recreationally active or trained/developmental runners (mean  
57 [SD]; age = 29 [7] years; body mass = 65.5 [9.4] kg; height = 170.7 [8.1] cm;  $\dot{V}O_{2\max}$ , 59.0  
58 [4.2] ml·kg<sup>-1</sup>·min<sup>-1</sup>) were recruited using convenience sampling. Written informed consent was  
59 provided by the runners to participate in the experimental procedures, which were approved by  
60 the University of Calgary Conjoint Health Research Ethics Board (REB20-1377). Participants  
61 were free of medical conditions and injuries that could interfere with metabolic and  
62 cardiorespiratory exercise responses. All participants provided their own lightweight running  
63 shoes and wore the same shoes for all testing sessions.

## 64 Experimental Design

65 Participants visited the University of Calgary for a total of five visits separated by at least  
66 48 hours. Visit 1 consisted of a step-ramp-step treadmill running test to determine  $\dot{V}O_{2\max}$ .<sup>8</sup> All  
67 subsequent visits were performed on a 400m outdoor athletic track with running power data  
68 collected using the Stryd running power device (Model v.19, firmware v.2.1.16, software v.4;  
69 Boulder, CO, USA).

70 For all visits on the outdoor running track, participants performed the same standardized  
71 warm-up consisting of 800m of running at 2.4 m·s<sup>-1</sup> as well as any additional dynamic  
72 movements deemed necessary to prepare for the TTs by each runner. Runners were instructed to  
73 complete each TT as quickly as possible.

74 In a randomized order, visits 2 and 3 consisted of a 1200m (i.e., 3-lap) and 2400m (i.e., 6-  
75 lap) TT, as recommended by Stryd.<sup>9</sup> For each runner, the average running speed and power from

76 these TTs were used to construct 2-parameter hyperbolic speed-time and power-time models, with  
77 asymptotes of CS ( $CS_{2TT}$ ) and CP ( $CP_{2TT}$ ), respectively. For visit 4, runners completed a third TT  
78 for which the distance (i.e., 3600m, 4000m, or 4400m) was selected to require approximately 15  
79 min based on the  $CS_{2TT}$  model. Using the average running speed and power from all three  
80 running trials, speed-time and power-time relationships were constructed to again calculate each  
81 runner's CS and CP (i.e.,  $CS_{3TT}$  and  $CP_{3TT}$ , respectively).

82 Subsequently, for visit 5, participants were paced at their calculated  $CS_{3TT}$  for 800m, and  
83 following a short familiarization period, participants self-paced an 800m run at their calculated  
84  $CP_{3TT}$  using a sport watch (Garmin; Olathe, KS, USA) connected to their Stryd running pod to  
85 view real-time running power. The difference in average running speed for the 800m run at  
86  $CS_{3TT}$  (i.e.,  $CS_{800}$ ) and the calculated  $CS_{3TT}$  (Table 1;  $0.00 [0.03] \text{ m}\cdot\text{s}^{-1}$ ) was not statistically  
87 significant ( $p=0.790$ ,  $d=0.09$ ), indicating that the runners were accurately paced; however, the  
88 average running power during the 800m run at  $CP_{3TT}$  (i.e.,  $CP_{800}$ ) was significantly greater ( $+4$   
89  $[6] \text{ W}$ ; Table 1) than the calculated  $CP_{3TT}$  ( $p=0.037$ ;  $d=0.77$ ), indicating that self-pacing using  
90 the sport watch was slightly too fast. Accordingly, only the  $CS_{800}$  trial was used for analysis.

### 91 **Statistical Analysis**

92 Paired Student's t tests were used to compare pairs of variables, with effect sizes  
93 calculated using Cohen's d for paired variables.<sup>10</sup> Agreement between pairs of variables was  
94 assessed by Bland-Altman analyses (with 95% limits of agreement) and two-way mixed effects,  
95 absolute agreement, single rater intraclass correlation models.

96 Data are presented as mean [standard deviation (SD)]. Statistical significance was set at  
97 an  $\alpha$  level of  $< 0.05$ . Statistical analyses were performed using Statistical Package for the Social  
98 Sciences (SPSS, version 26, IBM, Armonk, NY, USA), with data visualization performed using  
99 Prism (version 9.5.1 for macOS, GraphPad Software, San Diego, California USA).

### 100 **Results**

101 The  $CS_{3TT}$  was not significantly different from the  $CS_{2TT}$  (Table 1;  $p=0.178$ ;  $d=0.46$ ),  
102 with excellent reliability ( $ICC=0.951$ ; 95% C.I.= $0.809-0.988$ ) and low bias ( $-0.08 \text{ m}\cdot\text{s}^{-1}$ ; LOA: -  
103  $0.43$  to  $0.27 \text{ m}\cdot\text{s}^{-1}$ ; Figure 1) between variables. In contrast, the  $CP_{3TT}$  was significantly lower  
104 than the  $CP_{2TT}$  (Table 1;  $p=0.041$ ;  $d=0.75$ ); however, there was still excellent reliability  
105 ( $ICC=0.954$ ; 95% C.I.= $0.741-0.990$ ) and low bias ( $-7 \text{ W}$ ; LOA:  $-27$  to  $12 \text{ W}$ ; Figure 1) between  
106 variables.

107 The average running power measured during the  $CS_{800}$  trial was not significantly  
108 different from the calculated  $CP_{3TT}$  (Table 1;  $p=0.940$ ;  $d=0.02$ ), and there was excellent  
109 reliability ( $ICC=0.980$ ; 95% C.I.= $0.918-0.995$ ) and low bias ( $0 \text{ W}$ ; LOA:  $-16$  to  $16 \text{ W}$ ; Figure 2)  
110 between variables.

### 111 **Discussion**

112 The results from this investigation indicated that the running critical intensity is not  
113 different when measured in units of speed (i.e., CS) or running power (i.e., CP from Stryd), as  
114 running at  $CS_{3TT}$  produced the running power associated with  $CP_{3TT}$ . Furthermore, two running  
115 trials (i.e., 1200m and 2400m) provided measures of CS and CP that were similar (2.1% and  
116 2.5% higher, respectively) to the CS and CP derived from three running trials (i.e., adding a third  
117 trial between 3600-4400m), suggesting that a third trial may not be necessary to derive a  
118 reasonable estimate of each parameter.

119 In support of our finding that CS and CP represent the same intensity of running on a flat  
120 outdoor track, strong associations were observed between running speed and Stryd running  
121 power<sup>6,7</sup> and between Stryd assessments of CP and measures of running fitness.<sup>11</sup> In slight

122 contrast to our primary finding,  $CS_{3TT}$  was not different from  $CS_{2TT}$ , whereas  $CP_{3TT}$  was  
123 significantly lower than  $CP_{2TT}$ . Although these results could suggest that running speed and  
124 running power do not represent equivalent exercise intensities, the relative differences, bias, and  
125 LOA between pairs of critical intensity measures were comparable (Figure 1). Thus, the lack of  
126 difference between  $CS_{2TT}$  and  $CS_{3TT}$  may be the result of a type II error. Even if there are true  
127 differences between running critical intensity measured with two or three TTs, the small  
128 differences in units of speed ( $\sim 0.3$  km/h) and power ( $\sim 7$  W) suggest that the addition of a third  
129 TT may not meaningfully impact applications of CS and CP for many individuals. Nevertheless,  
130 we previously demonstrated that Stryd running power provided a more accurate model to  
131 estimate the oxygen cost of treadmill running sessions compared to running speed,<sup>8</sup> suggesting  
132 that speed and Stryd power are not always interchangeable. Indeed, the relative oxygen cost of  
133 running may vary in response to increasing or decreasing running speeds,<sup>12</sup> indicating that a  
134 running power metric, like Stryd power, could more accurately represent the metabolic  
135 requirements of running than running speed.

### 136 **Conclusion**

137 In conclusion, this study demonstrated that the intensity associated with  $CS_{3TT}$  is similar  
138 to that of  $CP_{3TT}$  derived from Stryd and that two TTs (1200m and 2400m) are sufficient to  
139 estimate the CS or CP. Future investigations evaluating Stryd CP measures should consider  
140 evaluating the metric under conditions of varying gradient, wind speeds, and terrain, to assess the  
141 potential value of this running metric to inform training strategies in variable conditions.

142 **Acknowledgments**

143 All authors declare substantial contribution to the manuscript and no conflicts of interest.  
144 MJM has received several foot pods from Stryd for research purposes; however, Stryd were not  
145 involved in the conduct, analysis, or reporting of this study, and MJM has no professional  
146 relationship with Stryd. This work was supported by the Natural Sciences and Engineering  
147 Research Council of Canada (NSERC; grant number RGPIN-2018-06424), start-up funding from  
148 the Faculty of Kinesiology (University of Calgary), the NSERC CREATE Wearable Technology  
149 and Collaboration (We-TRAC) Training Program, and Alberta Innovates.

150 **References**

- 151 1. Poole DC, Burnley M, Vanhatalo A, Rossiter HB, Jones AM. Critical power: an  
152 important fatigue threshold in exercise physiology. *Med Sci Sports Exerc.* 2016;48(11):2320.  
153 doi:10.1249/MSS.0000000000000939
- 154 2. Williams KR, Cavanagh PR. A model for the calculation of mechanical power during  
155 distance running. *J Biomech.* 1983;16(2):115-128. doi:10.1016/0021-9290(83)90035-0
- 156 3. Kranenburg KJ, Smith DJ. Comparison of critical speed determined from track running  
157 and treadmill tests in elite runners. *Med Sci Sports Exerc.* 1996;28(5):614-618.  
158 doi:10.1097/00005768-199605000-00013
- 159 4. Broxterman R, Ade C, Craig J, Wilcox S, Schlup S, Barstow T. The relationship between  
160 critical speed and the respiratory compensation point: coincidence or equivalence. *Eur J Sport*  
161 *Sci.* 2015;15(7):631-639. doi:10.1080/17461391.2014.966764
- 162 5. Jaén-Carrillo D, Roche-Seruendo LE, Cartón-Llorente A, Ramírez-Campillo R, García-  
163 Pinillos F. Mechanical power in endurance running: a scoping review on sensors for power  
164 output estimation during running. *Sensors.* 2020;20(22):6482. doi:10.3390/s20226482
- 165 6. García-Pinillos F, Latorre-Román PÁ, Roche-Seruendo LE, García-Ramos A. Prediction  
166 of power output at different running velocities through the two-point method with the Stryd™  
167 power meter. *Gait Posture.* 2019;68:238-243. doi:10.1016/j.gaitpost.2018.11.037
- 168 7. Taboga P, Giovanelli N, Spinazzè E, et al. Running power: lab based vs. portable devices  
169 measurements and its relationship with aerobic power. *Eur J Sport Sci.* 2022;22(10):1555-1568.  
170 doi:10.1080/17461391.2021.1966104
- 171 8. van Rassel CR, Ajayi OO, Sales KM, Azevedo RA, Murias JM, MacInnis MJ. A " Step-  
172 Ramp-Step" protocol to identify running speed and power associated with the maximal  
173 metabolic steady state. *Med Sci Sports Exerc.* 2023;55(3):534-547.  
174 doi:10.1249/MSS.0000000000003066
- 175 9. Stryd T. Running power: Training and racing with power. 2023. Accessed June 1st, 2023.  
176 [https://storage.googleapis.com/stryd\\_static\\_assets/power-training-manual/power-training-](https://storage.googleapis.com/stryd_static_assets/power-training-manual/power-training-manual-v14.pdf)  
177 [manual-v14.pdf](https://storage.googleapis.com/stryd_static_assets/power-training-manual/power-training-manual-v14.pdf)
- 178 10. Cohen J. Quantitative methods in psychology: A power primer. *Psychol Bull.*  
179 1992;112:1155-1159.
- 180 11. Ruiz-Alias SA, Olaya-Cuartero J, Ñancupil-Andrade AA, García-Pinillos F. 9/3-minute  
181 running critical power test: Mechanical threshold location With respect to ventilatory thresholds  
182 and maximum oxygen uptake. *Int J Sports Physiol Perform.* 2022;1(aop):1-8.  
183 doi:10.1123/ijsp.2022-0069
- 184 12. Batliner ME, Kipp S, Grabowski AM, Kram R, Byrnes WC. Does metabolic rate increase  
185 linearly with running speed in all distance runners? *Sports Med Int Open.* 2018;2(01):E1-E8.  
186 doi:10.1055/s-0043-122068  
187

188 **Figure captions**

189

190 **Figure 1.** Relationships between the critical speed (CS) and critical power (CP) calculated from  
191 two (2TT) and three time trials (3TT). Panels A ( $CS_{3TT}$  and  $CS_{2TT}$ ) and B ( $CP_{3TT}$  and  $CP_{2TT}$ )  
192 depict Bland-Altman analysis, with lines indicating bias (solid line) and limits of agreement  
193 (LOA, dashed line). Panels C ( $CS_{3TT}$  and  $CS_{2TT}$ ) and D ( $CP_{3TT}$  and  $CP_{2TT}$ ) depict the  
194 relationships between values.  $n=10$  for all panels.

195

196 **Figure 2.** Relationships between the three time trial critical power ( $CP_{3TT}$ ) and the running  
197 power at critical speed measured over 800 m ( $CS_{800}$ ). Panel A depicts Bland-Altman analysis,  
198 with lines indicating bias (solid line) and limits of agreement (LOA, dashed line). Panel B  
199 depicts the relationships between values.  $n=10$  for all panels.



**Table 1.** Calculated critical speed (CS) and critical power (CP) from two and three time-trials, and the measured running speed and power during 800m of running at CS<sub>3TT</sub> (i.e., CS<sub>800</sub>) and CP<sub>3TT</sub> (i.e., CS<sub>800</sub>).

| Subject        | $\dot{V}O_{2max}$<br>(mL·kg <sup>-1</sup> ·min <sup>-1</sup> ) | <i>Calculated</i>    |                      |                   |                   | <i>Measured</i>            |                            |                            |                            |
|----------------|----------------------------------------------------------------|----------------------|----------------------|-------------------|-------------------|----------------------------|----------------------------|----------------------------|----------------------------|
|                |                                                                | CS <sub>3TT</sub>    | CS <sub>2TT</sub>    | CP <sub>3TT</sub> | CP <sub>2TT</sub> | Speed at CS <sub>800</sub> | Speed at CP <sub>800</sub> | Power at CS <sub>800</sub> | Power at CP <sub>800</sub> |
|                |                                                                | (m·s <sup>-1</sup> ) | (m·s <sup>-1</sup> ) | (W)               | (W)               | (m·s <sup>-1</sup> )       | (m·s <sup>-1</sup> )       | (W)                        | (W)                        |
| <b>1</b>       | 57.5                                                           | 3.98                 | 3.99                 | 263               | 258               | 3.94                       | 4.30                       | 255                        | 273                        |
| <b>2</b>       | 68.5                                                           | 4.44                 | 4.51                 | 309               | 325               | 4.40                       | 4.60                       | 317                        | 323                        |
| <b>3</b>       | 58.1                                                           | 3.93                 | 4.26                 | 288               | 302               | 3.94                       | 4.02                       | 277                        | 285                        |
| <b>4</b>       | 62.4                                                           | 3.94                 | 3.73                 | 236               | 234               | 4.02                       | 3.90                       | 240                        | 246                        |
| <b>5</b>       | 55.3                                                           | 3.95                 | 4.03                 | 272               | 283               | 3.94                       | 3.98                       | 275                        | 271                        |
| <b>6</b>       | 55.2                                                           | 3.35                 | 3.42                 | 300               | 309               | 3.36                       | 3.29                       | 307                        | 300                        |
| <b>7</b>       | 57.1                                                           | 3.33                 | 3.75                 | 225               | 249               | 3.33                       | 3.28                       | 228                        | 225                        |
| <b>8</b>       | 57.5                                                           | 3.37                 | 3.43                 | 297               | 289               | 3.36                       | 3.67                       | 283                        | 301                        |
| <b>9</b>       | 62.4                                                           | 4.65                 | 4.67                 | 253               | 260               | 4.65                       | 4.57                       | 262                        | 258                        |
| <b>10</b>      | 56.5                                                           | 3.93                 | 3.90                 | 260               | 269               | 3.90                       | 3.90                       | 261                        | 264                        |
| <b>Average</b> | 59.0                                                           | 3.89                 | 3.97                 | 270               | 278               | 3.88                       | 3.95                       | 271                        | 275                        |
| <b>SD</b>      | 4.2                                                            | 0.44                 | 0.42                 | 28                | 29                | 0.44                       | 0.46                       | 28                         | 29                         |

$\dot{V}O_{2max}$ , maximal oxygen uptake; 2TT, two time trials; 3TT, three time trials.

A

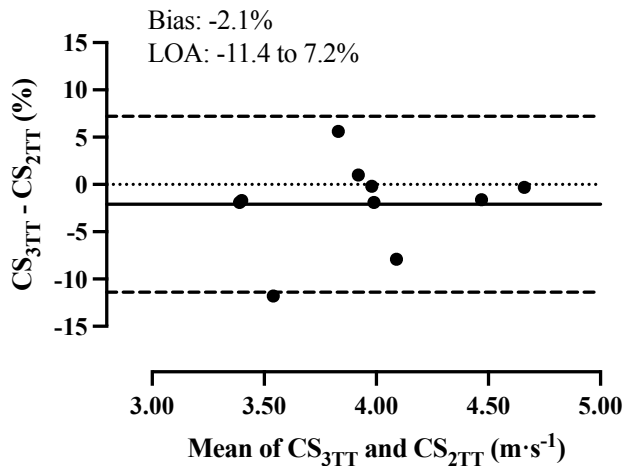

B

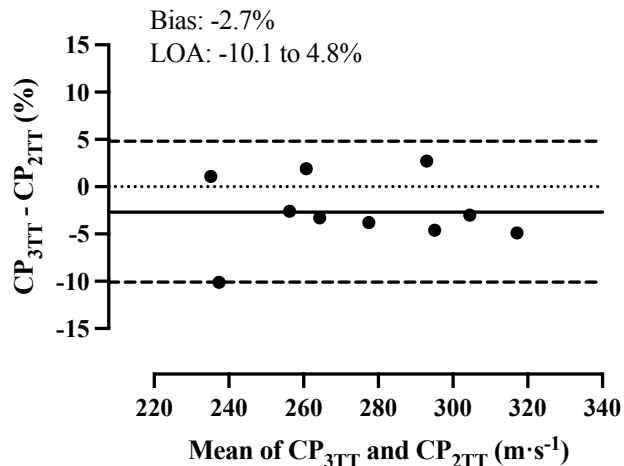

C

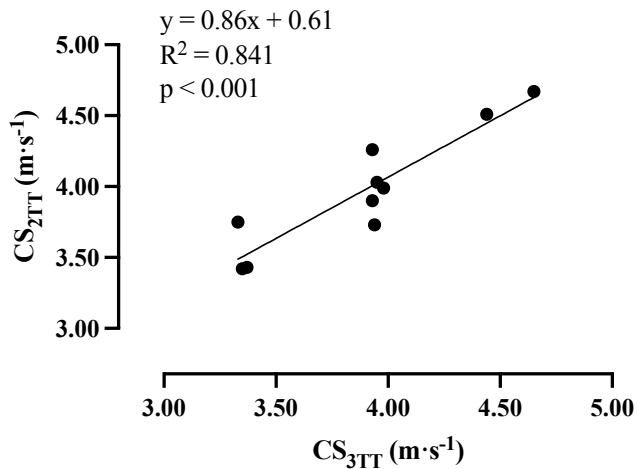

D

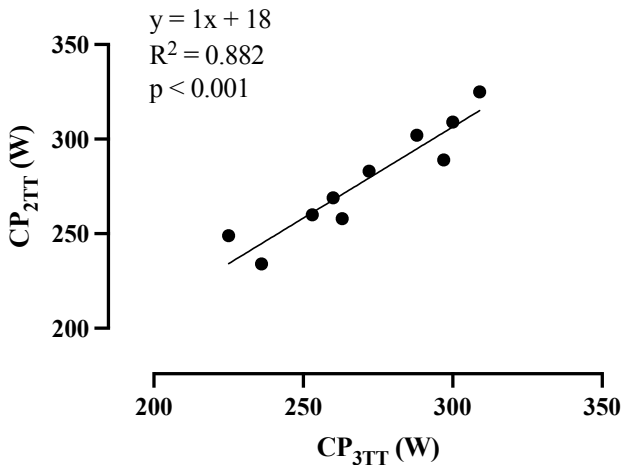

A

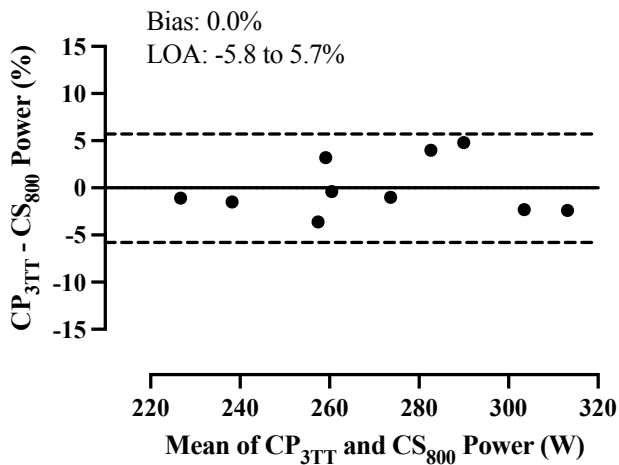

B

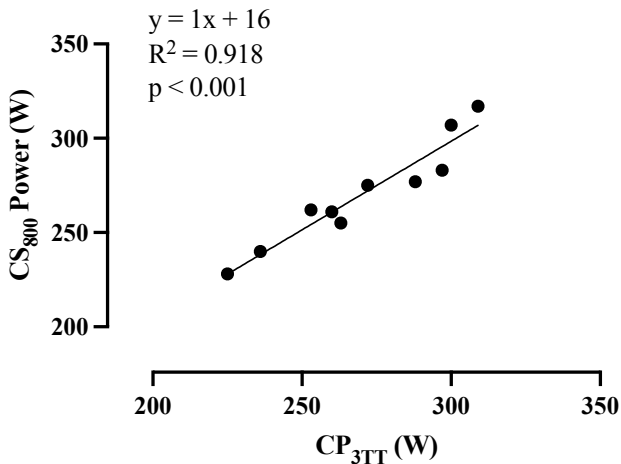

Source: https://medrxiv.org/content/10.1101/2023.07.04.23292118.full.pdf
